# Supplementary material
Source: PubMed Central journal article supplement (PMC3775476)
Supplement: NIHMS361406-supplement-1.pdf [file NIHMS361406-supplement-1.pdf]

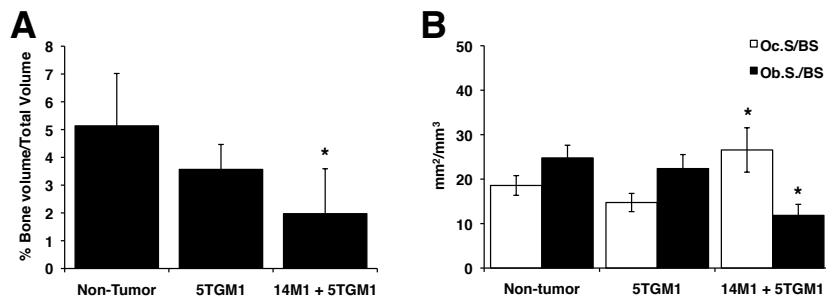

**Supplementary Figure 1. 14M1 BMSCs promote myeloma bone disease in non-permissive C57Bl6 mice.** C57Bl6 mice were inoculated with either  $10^6$  5TGM1-GFP cells alone,  $5 \times 10^5$  5TGM1-GFP +  $5 \times 10^5$  14M1 BMSCs or vehicle control (PBS). Co-inoculation of 5TGM1 myeloma cells plus 14M1 BMSCs significantly decreased trabecular bone volume (A) and osteoblast number (B), and increased osteoclast number (B). \* $p < 0.05$ , as compared to 5TGM1.

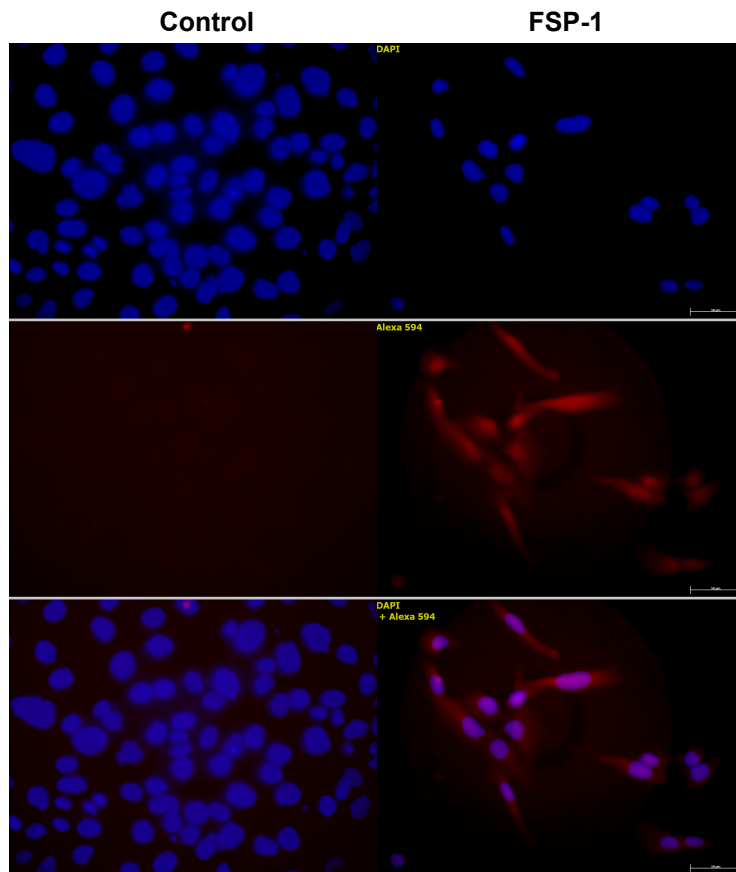

**Supplementary Figure 2. 14M1 BMSCs express FSP-1.** 14M1 BMSCs were stained with anti-FSP-1 (red) and counter-stained with DAPI (blue) to identify fibroblasts.

## Supplemental Data

### Figure 2

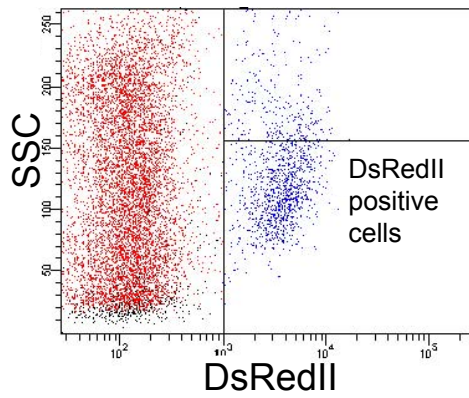

**Supplementary Figure 3. 14M1 DsRedII BMSCs engraft in C57Bl6 mice.** 14M1 BMSCs were stably transfected with DsRedII. 4 weeks following inoculation into C57Bl6 mice, 12.45%  $\pm$  1.05% DsRedII positive cells could be detected in bone marrow by flow cytometry.

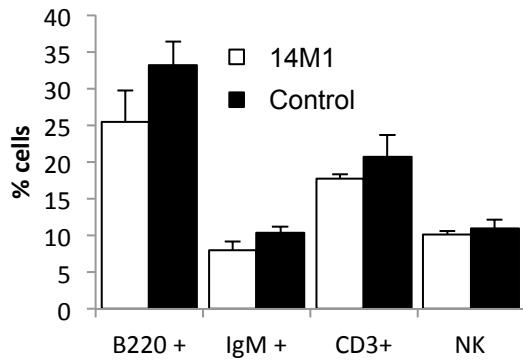

**Supplementary Figure 4. Inoculation of 14M1 BMSCs has no significant effect on the proportion of B, T and NK cells in the bone marrow.** C57Bl6 mice were inoculated with 14M1 BMSCs, and the proportion of B (B220+ or IgM+), T (CD3) and NK cells quantitated by flow cytometry (n=5).

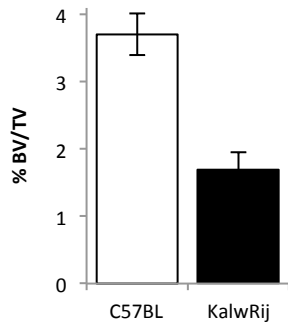

**Supplementary Figure 5. KaLwRij mice have decreased trabecular bone volume.**

Trabecular bone volume was quantitated by microCT analysis in age- and sex-matched C57Bl6 and KaLwRij mice (n=5). \*\*p<0.01 as compared to control.

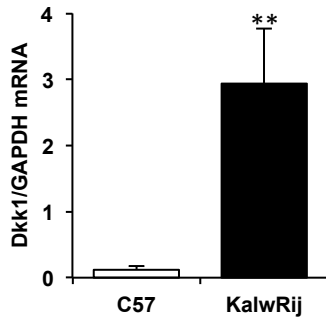

**Supplementary Figure 6. BMSCs from KaLwRij mice have increased Dkk1.** Primary BMSCs were cultured from age- and sex-matched C57Bl6 and KaLwRij mice. Dkk1 expression was measured by real-time PCR. \*\* $p < 0.01$  as compared to C57.

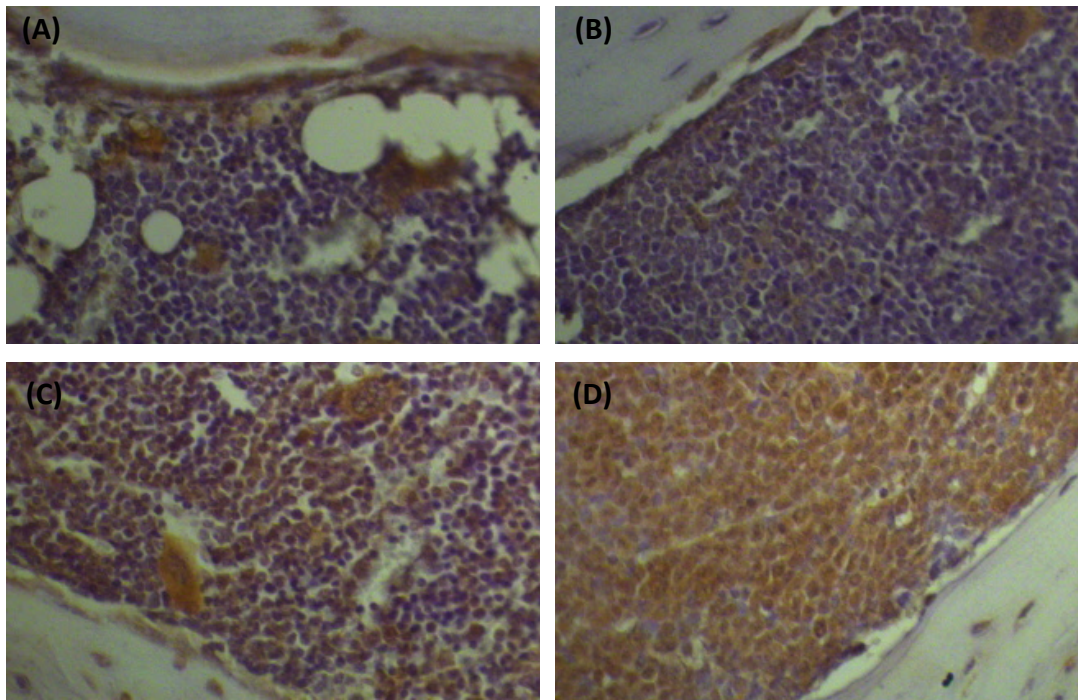

Table 1. Bone marrow expression of Dkk1 by immunohistochemistry<sup>a</sup>

|              |                  |
|--------------|------------------|
| Non-tumor    | + <sup>b</sup>   |
| 14M1         | ++ <sup>b</sup>  |
| 5TGM1        | + <sup>b</sup>   |
| 5TGM1 + 14M1 | +++ <sup>c</sup> |

<sup>a</sup>Expression was quantitated by an independent investigator in 10 random areas per section. <sup>b</sup>Expression in bone marrow stroma. <sup>c</sup>Expression detected in myeloma cells

**Supplementary Figure 7. Dkk1 expression in bone marrow.** Dkk1 expression was increased in the bone marrow of mice inoculated with 14M1 BMSCs (C), as compared with non-tumor bearing mice (A) or mice inoculated with 5TGM1 myeloma cells alone. Dkk1 expression was detected in 5TGM1 myeloma cells following co-inoculation of 14M1 BMSCs and 5TGM1 myeloma cells (D). Dkk1 expression in osteoblasts, areas of stromal cells and myeloma cells (apparent by “clock-face nuclei”) is observed. Histological sections were analyzed semi-quantitatively and data is presented in Table 1.

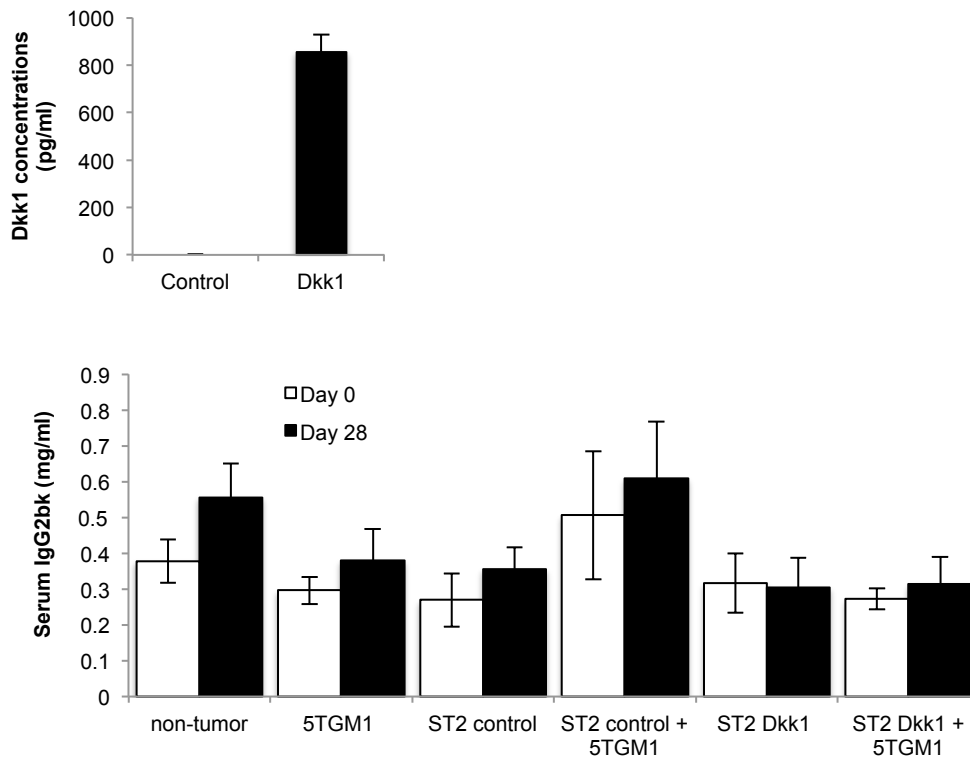

**Supplementary Figure 8. Over-expression of Dkk1 in ST2 BMSCs does not induce myeloma development in C57Bl6 mice.** ST2 BMSCs were stably transfected with Dkk1 or an empty vector control, with a detectable increase in secreted Dkk1 (A). C57Bl6 mice were inoculated with either  $10^6$  5TGM1-GFP cells alone,  $5 \times 10^5$  5TGM1-GFP +  $5 \times 10^5$  ST2 control BMSCs,  $5 \times 10^5$  5TGM1-GFP +  $5 \times 10^5$  ST2 Dkk1 BMSCs,  $5 \times 10^5$  ST2 control BMSCs,  $5 \times 10^5$  ST2 Dkk1 BMSCs or vehicle control (PBS). Co-inoculation of 5TGM1 myeloma cells plus ST2 cells over-expressing Dkk1 had no effect on serum IgG2bk (B).
